# Supplementary material for: D-Alanine-Controlled Transient Intestinal Mono-Colonization with Non-Laboratory-Adapted Commensal E. coli Strain HS
Source: PubMed Central journal article supplement (PMC4803232; doi:10.1371/journal.pone.0151872), 2016-03-22

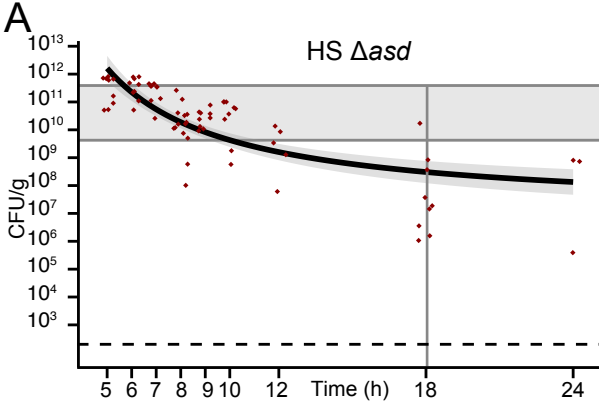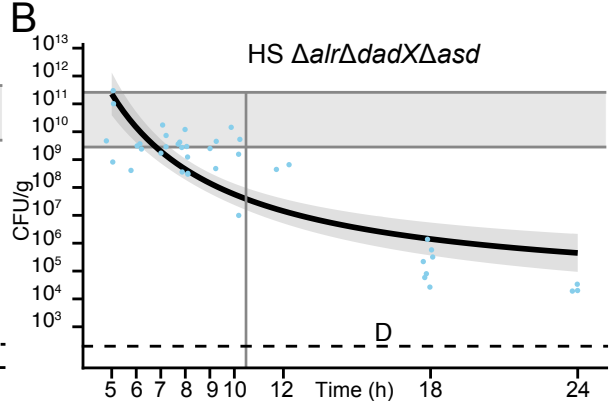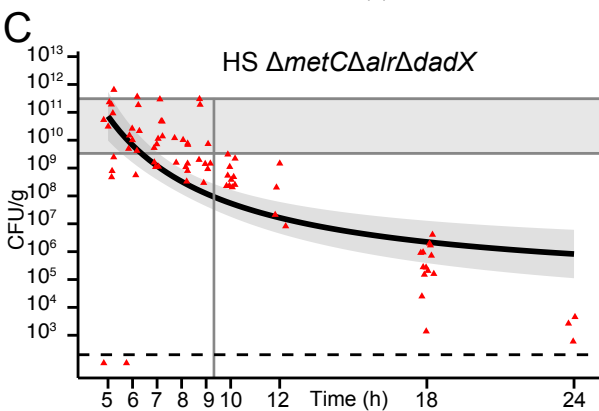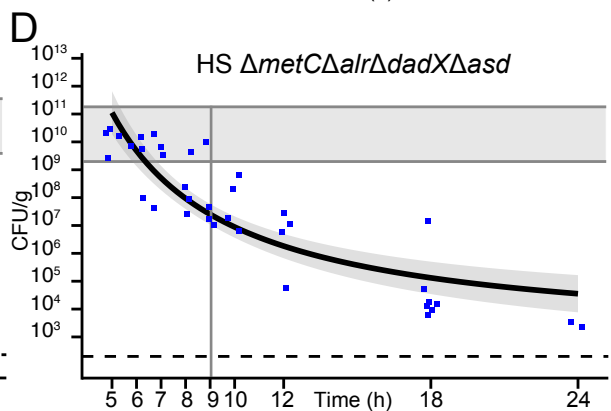

Supplement: pone.0151872.s002.pdf [file pone.0151872.s002.pdf]
